# Supplementary material for: Effects of salinity change on two superoxide dismutases (SODs) in juvenile marbled eel Anguilla marmorata
Source: PeerJ. 2016 Aug 2;4:e2149. doi: 10.7717/peerj.2149 (PMC4975029; doi:10.7717/peerj.2149)
Supplement: Supplemental Information 2 — The tissues of gill, intestine, kidney, liver and muscle were collected from six juvenile eels from control group (FW (0 h, salinity of 0‰)) and salinity adapted groups (10‰(BW), 25‰(SW)) at desired time points (1, 3, 6, 12, 24 and 48 h) to assess the expressions of AmMnSOD and AmCu/ZnSOD at the mRNA level. The relative expression datas of AmMnSOD and AmCu/ZnSOD transcripts was determined by the 2−ΔΔCt comparative Ct method using β-actin as an internal control reference. The fold-change post salinity treatment was determined by comparing with the expression level in FW group (0 h). Each experiment was conducted in triplicate. [file peerj-04-2149-s002.xlsx]

## Sheet: 10盐度
10盐度	Gill	CT1	CT2	CT3	ΔCT1	ΔCT2	ΔCT3	ΔΔCT1	ΔΔCT2	ΔΔCT3	2^-ΔΔCT1	2^-ΔΔCT2	2^-ΔΔCT3	mean	SD
actin	0h	23.0106	22.9422	22.8832
	1h	25.9758	25.9439	25.9708
	3h	28.4236	28.282	28.6622
	6h	27.3958	27.2805	27.152
	12h	26.4293	26.3207	26.418
	24h	27.6368	27.5828	27.6686
	48h	27.4412	27.3194	27.5024
Mn	0h	24.8304	24.9385	24.8135	1.81978	1.99635	1.9303	1.35639	1.5139	0.96699	0.390558	0.350163	0.511572	1	0.04657
	1h	26.4392	26.4264	26.9341	0.46339	0.482443	0.963314	0	0	0	1	1	1	2.457	0.459348
	3h	31.8156	31.6916	31.3927	3.39202	3.40961	2.7305	2.92863	2.92716	1.76719	0.13134	0.131473	0.293781	0.428674	0.127604
	6h	30.87	30.801	30.8896	3.47423	3.52053	3.73767	3.01084	3.03809	2.77435	0.124064	0.121743	0.146163	0.317016	0.030986
	12h	27.9345	27.8036	27.6877	1.50517	1.48284	1.26968	1.04178	1.0004	0.30637	0.485729	0.499862	0.808674	1.41732	0.168772
	24h	26.6398	26.6382	26.6463	-0.997009	-0.944569	-1.02229	-1.4604	-1.42701	-1.9856	2.75185	2.68889	3.96028	7.48876	0.384768
	48h	28.8413	28.6128	28.8769	1.40017	1.29345	1.37447	0.936779	0.811005	0.411156	0.522398	0.569985	0.752021	1.47845	0.145285
Cu	0h	22.8279	22.7817	22.646	-0.182673	-0.160452	-0.237238	1.27784	1.40944	1.42233	0.412412	0.376459	0.37311	1	0.20425
	1h	24.5153	24.374	24.3112	-1.46052	-1.56989	-1.65956	0	0	0	1	1	1	2.58709	0.14108
	3h	28.7042	28.6323	28.4677	0.280628	0.350338	-0.194565	1.74114	1.92023	1.465	0.299132	0.264213	0.362236	0.799339	0.149
	6h	28.4548	28.3622	28.1585	1.05902	1.08169	1.00652	2.51954	2.65158	2.66608	0.174398	0.159146	0.157554	0.42263	0.000317405
	12h	25.164	25.5214	25.1733	-1.26535	-0.799368	-1.24478	0.195168	0.770519	0.414783	0.873471	0.586206	0.750132	1.8952	0.297644
	24h	24.7539	24.8819	24.6037	-2.88288	-2.70094	-3.06491	-1.42237	-1.13105	-1.40535	2.68025	2.19018	2.64882	6.47204	0.641155
	48h	26.2417	26.2831	26.251	-1.19949	-1.03626	-1.25138	0.261024	0.533625	0.408188	0.834495	0.690817	0.753569	1.9594	0.107712
	Intestine													--	--
actin	0h	24.7254	24.6503	24.5284										--	--
	1h	26.4158	26.1889	26.1545										--	--
	3h	28.1968	28.73	28.271										--	--
	6h	25.3326	25.3732	25.2624										--	--
	12h	27.9531	28.1252	27.9867										--	--
	24h	29.5256	29.44	29.2657										--	--
	48h	28.1237	28.1132	28.0659										--	--
Mn	0h	25.974	26.002	25.9477	1.24864	1.35172	1.41929	1.06429	0.615253	0.634487	0.478208	0.652815	0.64417	1	0.06414
	1h	26.6002	26.9254	26.9393	0.184351	0.736467	0.7848	0	0	0	1	1	1	1.72512	0.317151
	3h	28.1867	27.6487	27.673	-0.010046	-1.08131	-0.597956	-0.194397	-1.81777	-1.38276	1.14425	3.52537	2.60766	3.94704	1.50628
	6h	27.7702	27.2458	27.6026	2.43758	1.87264	2.34015	2.25323	1.13618	1.55535	0.209754	0.454964	0.340246	0.554581	0.131157
	12h	28.1881	28.5156	28.3163	0.235039	0.390396	0.329596	0.0506878	-0.346071	-0.455204	0.965476	1.27109	1.37098	2.03144	0.0912381
	24h	27.7985	26.4459	27.8253	-1.7271	-2.99418	-1.44042	-1.91146	-3.73064	-2.22522	3.76188	13.275	4.67581	11.8201	7.38042
	48h	26.4465	26.2553	27.6493	-1.67717	-1.85796	-0.416658	-1.86152	-2.59443	-1.20146	3.63391	6.03951	2.29972	6.80685	2.92238
Cu	0h	23.0219	23.3938	23.0438	-1.70351	-1.25655	-1.48459	1.07532	1.11081	0.960215	0.474565	0.463034	0.51398	1	0.15085
	1h	23.637	23.8216	23.7097	-2.77884	-2.36736	-2.44481	0	0	0	1	1	1	2.07082	0.111574
	3h	24.723	25.0915	25.0861	-3.47378	-3.63849	-3.18489	-0.694944	-1.27113	-0.740089	1.61882	2.41351	1.67028	3.95775	1.08954
	6h	23.9693	22.215	22.2782	-1.36323	-3.15816	-2.98422	1.41561	-0.790796	-0.539412	0.374851	1.73003	1.45338	2.45129	1.50884
	12h	23.4098	22.5835	23.6742	-4.54329	-5.54177	-4.31257	-1.76445	-3.17441	-1.86777	3.39745	9.02801	3.64967	11.2525	7.14049
	24h	24.9657	23.9757	24.8754	-4.55996	-5.46433	-4.39035	-1.78112	-3.09697	-1.94554	3.43693	8.5562	3.85183	11.0717	6.41581
	48h	23.5816	24.0374	23.5281	-4.54208	-4.0758	-4.53783	-1.76324	-1.70844	-2.09303	3.3946	3.26806	4.26642	7.50392	0.69171
	Kidney													--	--
actin	0h	21.8789	22.0403	21.8213										--	--
	1h	23.9611	23.9334	23.9133										--	--
	3h	24.1497	24.0548	24.2093										--	--
	6h	22.557	22.3012	22.0217										--	--
	12h	24.5705	24.3663	24.4419										--	--
	24h	24.303	24.1397	24.2804										--	--
	48h	23.9126	23.9026	23.9147										--	--
Mn	0h	24.0164	23.901	24.2695	2.13752	1.86076	2.44822	1.22253	0.983782	1.42712	0.42853	0.505653	0.371871	1	0.13677
	1h	24.876	24.8104	24.9344	0.914984	0.876982	1.0211	0	0	0	1	1	1	2.33343	0.355729
	3h	26.7721	26.8642	26.7576	2.62241	2.8094	2.54831	1.70743	1.93242	1.52722	0.306206	0.261989	0.346946	0.721881	0.207523
	6h	23.546	23.5103	23.9256	0.988972	1.20905	1.90393	0.073988	0.332071	0.882833	0.950008	0.794395	0.542301	1.74874	0.409334
	12h	24.873	25.0184	25.1854	0.302546	0.652096	0.743555	-0.612438	-0.224886	-0.27754	1.52884	1.16868	1.21213	3.04614	0.654819
	24h	26.5742	26.8718	26.7507	2.27121	2.73209	2.47022	1.35623	1.85511	1.44913	0.390602	0.276412	0.366243	0.814334	0.23471
	48h	24.9267	25.353	24.9597	1.01407	1.4504	1.045	0.0990829	0.57342	0.0239048	0.933626	0.672022	0.983567	2.05087	0.667191
Cu	0h	21.2964	21.0685	21.1438	-0.582472	-0.971756	-0.677471	2.31074	2.16736	2.14425	0.201557	0.222618	0.226213	1	0.27284
	1h	21.0678	20.7943	21.0916	-2.89321	-3.13911	-2.82172	0	0	0	1	1	1	4.62466	0.293775
	3h	23.2154	23.1997	22.4709	-0.93432	-0.855152	-1.73845	1.95889	2.28396	1.08327	0.257226	0.205333	0.471957	1.4283	0.596714
	6h	20.2422	20.5831	20.3129	-2.31484	-1.71815	-1.70875	0.578375	1.42096	1.11297	0.669718	0.373463	0.46234	2.34805	0.863725
	12h	23.1071	22.9413	23.1101	-1.46337	-1.42499	-1.33183	1.42984	1.71412	1.48989	0.371172	0.304788	0.356041	1.59485	0.236902
	24h	23.6182	23.5689	23.3986	-0.684824	-0.570749	-0.881834	2.20839	2.56836	1.93989	0.216376	0.168595	0.260637	0.994343	0.208993
	48h	21.2511	21.5092	21.2699	-2.66158	-2.39344	-2.64481	0.231632	0.745672	0.176908	0.851671	0.59639	0.884597	3.60497	0.817248
	Liver													--	--
actin	0h	24.6196	24.8939	24.4672										--	--
	1h	28.9347	28.624	28.4935										--	--
	3h	27.3046	27.2619	27.7061										--	--
	6h	28.9171	28.7703	28.8605										--	--
	12h	28.2101	27.943	28.1264										--	--
	24h	28.649	28.1926	28.5433										--	--
	48h	27.6959	27.6519	27.7029										--	--
Mn	0h	23.9604	24.8391	24.7759	-0.659176	-0.0548325	0.308722	2.83034	3.52603	3.47996	0.1406	0.086808	0.0896247	1	0.089013
	1h	25.4452	25.0431	25.3222	-3.48951	-3.58086	-3.17124	0	0	0	1	1	1	9.9299	2.44674
	3h	26.2867	25.5101	26.2752	-1.01793	-1.75181	-1.4309	2.47158	1.82905	1.74034	0.180294	0.28145	0.2993	2.62134	1.16064
	6h	26.9422	26.3113	26.9864	-1.97484	-2.45906	-1.87406	1.51467	1.1218	1.29718	0.349977	0.459519	0.406922	4.10766	1.45136
	12h	24.5988	24.2034	24.4574	-3.61131	-3.7396	-3.66906	-0.121801	-0.158745	-0.497824	1.08809	1.11632	1.41208	12.118	4.0594
	24h	23.967	23.7508	23.5605	-4.68206	-4.44181	-4.98277	-1.19254	-0.860954	-1.81153	2.28556	1.81624	3.51015	25.4477	12.1065
	48h	24.9842	24.8902	24.5342	-2.71169	-2.76171	-3.16875	0.777824	0.819149	0.00248528	0.583246	0.566776	0.998279	7.27193	3.55379
Cu	0h	19.0021	19.2304	19.3696	-5.61751	-5.66353	-5.09753	4.86909	4.31796	4.64234	0.0342184	0.0501377	0.040042	1	0.05758
	1h	18.4481	18.6425	18.7536	-10.4866	-9.98149	-9.73988	0	0	0	1	1	1	24.7143	4.64494
	3h	19.1795	19.2109	18.9385	-8.12509	-8.05098	-8.76767	2.36151	1.93052	0.972206	0.194587	0.262335	0.509726	7.8829	4.20367
	6h	20.1125	20.1392	20.3419	-8.80454	-8.63114	-8.51859	1.68206	1.35036	1.22128	0.311638	0.392194	0.428901	9.21365	1.4474
	12h	18.456	18.6067	18.6952	-9.75415	-9.33635	-9.43124	0.732452	0.645144	0.308636	0.60188	0.639429	0.807405	16.8356	3.76232
	24h	18.5439	18.7659	18.5001	-10.1052	-9.42674	-10.0433	0.381439	0.554754	-0.303377	0.767671	0.680773	1.23403	22.277	8.62125
	48h	20.638	20.6462	20.8527	-7.05795	-7.00571	-6.85017	3.42865	2.97578	2.88971	0.0928695	0.127116	0.134931	2.87303	0.439337
	Mucsle													--	--
actin	0h	25.908	25.9493	25.8797										--	--
	1h	28.9492	28.941	28.3139										--	--
	3h	27.3568	27.8246	27.7351										--	--
	6h	28.1144	28.4591	28.4184										--	--
	12h	28.9848	28.8038	28.9415										--	--
	24h	27.3977	27.0183	27.8734										--	--
	48h	29.8113	30.1196	30.1835										--	--
Mn	0h	23.8432	23.9971	24.0738	-2.06481	-1.9522	-1.80585	1.02725	1.03944	1.76519	0.490643	0.486516	0.294187	1	0.0669
	1h	25.8571	25.9494	24.7429	-3.09206	-2.99164	-3.57104	0	0	0	1	1	1	2.49759	0.780863
	3h	26.2613	26.0389	26.9319	-1.09547	-1.78574	-0.803125	1.99659	1.2059	2.76792	0.250591	0.433499	0.146816	0.633608	0.223008
	6h	24.8514	26.1681	26.3155	-3.26298	-2.29096	-2.10296	-0.170921	0.700678	1.46808	1.12578	0.615283	0.361462	1.59595	0.605225
	12h	25.4996	26.3005	25.6765	-3.48516	-2.50329	-3.26504	-0.393095	0.488348	0.306004	1.31321	0.712841	0.808879	2.29708	0.721358
	24h	25.9789	25.7747	25.827	-1.4188	-1.24364	-2.04633	1.67326	1.748	1.52471	0.313544	0.297714	0.347549	0.810788	0.321234
	48h	26.9112	26.048	26.3387	-2.9001	-4.0716	-3.8448	0.191961	-1.07997	-0.273754	0.875415	2.11399	1.20895	3.41294	1.41543
Cu	0h	22.9716	23.3965	22.9773	-2.93634	-2.55282	-2.90235	1.72031	2.45446	1.06204	0.303483	0.182446	0.478955	1	0.0759
	1h	24.2926	23.9338	24.3496	-4.65665	-5.00728	-3.96439	0	0	0	1	1	1	3.62134	1.71996
	3h	23.9587	23.9153	22.8412	-3.39808	-3.9093	-4.89389	1.25857	1.09798	-0.929504	0.417959	0.467169	1.90462	2.63814	1.30144
	6h	24.8677	24.5387	23.7433	-3.24667	-3.92037	-4.67515	1.40998	1.08691	-0.710766	0.376318	0.470769	1.63667	2.41249	1.09825
	12h	24.5054	24.532	24.8479	-4.47931	-4.27181	-4.09355	0.177334	0.735466	-0.129166	0.884336	0.600624	1.09366	2.82981	0.50955
	24h	23.8399	23.8838	23.8571	-3.55782	-3.13456	-4.0163	1.09883	1.87272	-0.0519104	0.466895	0.273057	1.03664	1.73316	0.374029
	48h	26.5761	27.33	27.1702	-3.23518	-2.78955	-3.01334	1.42147	2.21773	0.951048	0.373331	0.214979	0.517257	1.16281	0.0762824

## Sheet: 25盐度
25盐度	Gill	CT1	CT2	CT3	ΔCT1	ΔCT2	ΔCT3	ΔΔCT1	ΔΔCT2	ΔΔCT3	2^-ΔΔCT1	2^-ΔΔCT2	2^-ΔΔCT3	mean	SD
actin	0h	23.0106	22.9422	22.8832
	1h	24.742	24.7088	24.702
	3h	21.54	21.5102	21.4253
	6h	27.9361	27.67	27.3465
	12h	23.3357	23.3286	23.2975
	24h	20.7954	20.7715	20.7255
	48h	22.4185	22.5115	22.4667
Mn	0h	24.8304	24.9385	24.8135	1.81978	1.99635	1.9303	0	0	0	0.950041	1.04222	1.00774	1	0.04657
	1h	26.9089	27.4631	27.6895	2.16686	2.75422	2.98749	0.347078	0.75787	1.05719	0.786175	0.591369	0.480568	0.619371	0.154715
	3h	24.3611	25.1029	24.8822	2.82113	3.59273	3.45688	1.00135	1.59638	1.52658	0.499534	0.330705	0.347099	0.392446	0.0931021
	6h	29.3838	29.3979	28.8068	1.44773	1.72794	1.46022	-0.372047	-0.268408	-0.470087	1.29419	1.20448	1.38519	1.29462	0.0903584
	12h	24.6237	25.2563	25.1901	1.28797	1.92767	1.89255	-0.531815	-0.0686798	-0.0377579	1.44575	1.04876	1.02652	1.17367	0.235884
	24h	24.8139	24.1701	24.3703	4.01843	3.39856	3.64474	2.19865	1.40222	1.71444	0.217842	0.378348	0.304722	0.300304	0.080344
	48h	24.9518	25.0271	25.0865	2.53327	2.51552	2.61985	0.71349	0.519176	0.689548	0.609843	0.69777	0.620048	0.642554	0.0480902
Cu	0h	22.8279	22.7817	22.646	-0.182673	-0.160452	-0.237238	0	0	0	0.944268	0.829405	1.22633	1	0.20425
	1h	25.6656	25.456	25.7402	0.923584	0.74712	1.03822	1.10626	0.907572	1.27546	0.464498	0.533082	0.413093	0.470224	0.0601989
	3h	23.0167	23.0373	23.3759	1.47672	1.52714	1.95057	1.65939	1.68759	2.18781	0.316574	0.310445	0.219485	0.282168	0.0543712
	6h	27.1309	27.1537	27.2819	-0.805216	-0.516304	-0.0646095	-0.622543	-0.355852	0.172628	1.53959	1.27974	0.887225	1.23552	0.328422
	12h	22.6816	22.9414	22.6544	-0.654095	-0.387148	-0.64308	-0.471422	-0.226696	-0.405842	1.38648	1.17015	1.32486	1.29383	0.11145
	24h	22.086	22.223	21.976	1.29054	1.45148	1.25047	1.47321	1.61193	1.48771	0.36018	0.327159	0.356579	0.347973	0.0181145
	48h	22.2399	22.3913	22.0426	-0.178684	-0.120214	-0.424067	0.00398827	0.0402374	-0.186829	0.997239	0.972495	1.13826	1.036	0.0894208
	Intestine													--	--
actin	0h	24.7254	24.6503	24.5284										--	--
	1h	25.941	25.8216	25.8021										--	--
	3h	23.2424	23.1067	23.2145										--	--
	6h	27.8865	27.6999	27.7219										--	--
	12h	26.6054	26.6042	26.8286										--	--
	24h	22.8853	22.8556	22.6841										--	--
	48h	25.127	24.9452	24.8182										--	--
Mn	0h	25.974	26.002	25.9477	1.24864	1.35172	1.41929	0	0	0	0.931903	1.00884	1.05926	1	0.06414
	1h	27.2097	26.3489	26.091	1.26865	0.527302	0.288828	0.0200119	-0.824419	-1.13046	0.986225	1.77082	2.18928	1.64878	0.610745
	3h	24.516	24.3809	24.8592	1.27367	1.27426	1.64468	0.0250301	-0.0774651	0.225395	0.9828	1.05516	0.855361	0.964441	0.101158
	6h	28.3267	27.5652	28.3659	0.440151	-0.134708	0.644028	-0.808489	-1.48643	-0.775259	1.75138	2.80195	1.7115	2.08827	0.61838
	12h	23.9358	23.3888	23.3551	-2.66958	-3.21538	-3.4735	-3.91822	-4.5671	-4.89279	15.1182	23.7046	29.7082	22.8437	7.33299
	24h	23.6943	23.5743	23.268	0.80899	0.718628	0.583885	-0.43965	-0.633093	-0.835402	1.35627	1.55089	1.78435	1.56384	0.214333
	48h	24.7566	24.7545	24.9912	-0.370436	-0.190763	0.173002	-1.61908	-1.54248	-1.24628	3.07178	2.91296	2.3723	2.78568	0.366701
Cu	0h	23.0219	23.3938	23.0438	-1.70351	-1.25655	-1.48459	0	0	0	1.14982	0.848131	1.00205	1	0.15085
	1h	23.8106	23.7891	24.2224	-2.13047	-2.03249	-1.57972	-0.426954	-0.775936	-0.0951328	1.34439	1.7123	1.06816	1.37495	0.323154
	3h	20.9978	20.9019	20.8532	-2.24452	-2.20478	-2.36132	-0.54101	-0.948233	-0.876728	1.45499	1.92951	1.83621	1.74023	0.251395
	6h	24.8521	24.5229	24.9904	-3.03441	-3.177	-2.73146	-1.3309	-1.92045	-1.24687	2.5156	3.78541	2.37326	2.89142	0.777481
	12h	21.5641	21.8552	21.4086	-5.04122	-4.749	-5.42003	-3.33771	-3.49245	-3.93544	10.11	11.2547	15.2998	12.2215	2.72666
	24h	20.4693	20.5097	20.3467	-2.41592	-2.34597	-2.33737	-0.712408	-1.08942	-0.852781	1.63854	2.12788	1.80598	1.85747	0.248703
	48h	21.7883	21.9316	21.7185	-3.33875	-3.01357	-3.09965	-1.63524	-1.75702	-1.61506	3.10639	3.38	3.06325	3.18321	0.171786
	Kidney													--	--
actin	0h	21.8789	22.0403	21.8213										--	--
	1h	22.6288	22.7622	22.8219										--	--
	3h	21.9218	21.9064	22.0991										--	--
	6h	24.8447	24.9391	24.8051										--	--
	12h	24.4362	23.9885	24.5074										--	--
	24h	22.0986	21.8856	21.8294										--	--
	48h	24.3918	24.524	24.6183										--	--
Mn	0h	24.0164	23.901	24.2695	2.13752	1.86076	2.44822	0	0	0	0.994733	0.865941	1.13933	1	0.13677
	1h	25.87	25.4485	25.7728	3.24118	2.68627	2.95091	1.10367	0.825506	0.502689	0.465332	0.564284	0.70579	0.578469	0.120855
	3h	25.3286	25.5758	25.081	3.40678	3.6694	2.98195	1.26926	1.80864	0.533733	0.414871	0.28546	0.690765	0.463699	0.207017
	6h	27.9501	27.5476	27.915	3.10534	2.60847	3.10992	0.967823	0.747705	0.661703	0.511277	0.59555	0.632132	0.579653	0.0619758
	12h	24.9474	25.003	25.2395	0.511148	1.01452	0.732061	-1.62637	-0.846243	-1.71616	3.08735	1.79781	3.2856	2.72359	0.807849
	24h	24.7909	24.3351	24.8551	2.69238	2.44946	3.0257	0.554861	0.588701	0.577478	0.680723	0.664941	0.670134	0.671933	0.00804296
	48h	25.5522	25.1369	25.5777	1.16037	0.612881	0.959368	-0.977142	-1.24788	-1.48885	1.96856	2.37493	2.80665	2.38338	0.41911
Cu	0h	21.2964	21.0685	21.1438	-0.582472	-0.971756	-0.677471	0	0	0	0.782998	1.3063	0.910702	1	0.27284
	1h	20.256	20.1219	19.852	-2.37281	-2.64026	-2.96992	-1.79034	-1.66851	-2.29245	3.45897	3.17886	4.89888	3.84557	0.922884
	3h	19.9723	19.8315	19.9877	-1.94947	-2.07487	-2.11139	-1.367	-1.10311	-1.43392	2.57934	2.14817	2.7018	2.47644	0.290805
	6h	22.7533	22.8316	22.6585	-2.09145	-2.10754	-2.14656	-1.50898	-1.13579	-1.46909	2.84608	2.19739	2.76847	2.60398	0.354254
	12h	20.952	20.9299	20.9056	-3.48423	-3.05863	-3.60177	-2.90176	-2.08688	-2.9243	7.47337	4.24827	7.59104	6.43756	1.89689
	24h	19.6288	19.4718	19.8195	-2.46973	-2.41384	-2.00991	-1.88725	-1.44208	-1.33244	3.69931	2.71713	2.51828	2.97824	0.632327
	48h	19.8103	19.8691	20.0619	-4.58154	-4.65488	-4.55642	-3.99907	-3.68312	-3.87895	15.9897	12.8449	14.7123	14.5156	1.58157
	Liver													--	--
actin	0h	24.6196	24.8939	24.4672										--	--
	1h	23.5193	23.4418	23.7522										--	--
	3h	25.1183	25.0176	25.1671										--	--
	6h	24.6923	24.7478	24.7361										--	--
	12h	26.7319	26.9323	26.7708										--	--
	24h	24.2067	24.3081	24.1691										--	--
	48h	25.5413	25.9324	25.4542										--	--
Mn	0h	23.9604	24.8391	24.7759	-0.659176	-0.0548325	0.308722	0	0	0	1.93358	0.160841	0.905581	1	0.089013
	1h	23.6647	23.9319	24.1326	0.145342	0.49016	0.380381	0.804518	0.544992	0.0716591	0.572553	0.685395	0.951543	0.736497	0.194594
	3h	24.5011	24.3197	24.2992	-0.61722	-0.697872	-0.867929	0.0419559	-0.64304	-1.17665	0.971337	1.56162	2.26051	1.59782	0.645351
	6h	25.0885	24.8553	25.0086	0.396242	0.107481	0.272516	1.05542	0.162313	-0.0362053	0.481158	0.893591	1.02541	0.800054	0.283928
	12h	23.9805	24.0745	23.9032	-2.75139	-2.85781	-2.86762	-2.09221	-2.80298	-3.17634	4.26402	6.97882	9.04013	6.76099	2.39549
	24h	23.6148	23.175	23.3982	-0.591881	-1.13308	-0.770876	0.0672951	-1.07825	-1.0796	0.954426	2.11147	2.11345	1.72645	0.668591
	48h	23.9793	23.9557	24.219	-1.56193	-1.97674	-1.23517	-0.902756	-1.9219	-1.54389	1.86963	3.78923	2.91579	2.85822	0.961091
Cu	0h	19.0021	19.2304	19.3696	-5.61751	-5.66353	-5.09753	0	0	0	1.02894	1.03737	0.933695	1	0.05758
	1h	18.5286	18.6044	18.4836	-4.99078	-4.8374	-5.26862	0.626734	0.826134	-0.171087	0.647641	0.564039	1.12591	0.779195	0.303156
	3h	18.3751	18.4323	18.2589	-6.74322	-6.58525	-6.90825	-1.12571	-0.921717	-1.81072	2.18208	1.89437	3.50817	2.52821	0.860782
	6h	20.1059	20.0387	19.8422	-4.58637	-4.7091	-4.89391	1.03114	0.954437	0.203629	0.489322	0.516043	0.868364	0.624576	0.211548
	12h	20.111	19.936	19.5272	-6.62089	-6.99628	-7.24361	-1.00338	-1.33274	-2.14608	2.00469	2.51881	4.42622	2.98324	1.27583
	24h	18.6528	18.2646	18.5183	-5.55387	-6.04348	-5.65083	0.0636406	-0.379948	-0.553297	0.956846	1.30129	1.46744	1.24186	0.260432
	48h	19.1914	19.1653	19.0657	-6.34987	-6.76714	-6.38843	-0.732359	-1.1036	-1.2909	1.66135	2.1489	2.4468	2.08569	0.396521
	Mucsle													--	--
actin	0h	25.908	25.9493	25.8797										--	--
	1h	28.2148	28.5217	28.7423										--	--
	3h	25.5553	25.2576	24.9485										--	--
	6h	26.6672	26.4702	26.6294										--	--
	12h	26.9265	26.2474	26.8906										--	--
	24h	25.0147	24.935	24.7987										--	--
	48h	26.8299	26.4504	26.0977										--	--
Mn	0h	23.8432	23.9971	24.0738	-2.06481	-1.9522	-1.80585	0	0	0	1.06381	1.00579	0.930394	1	0.0669
	1h	28.8808	28.8988	28.6826	0.665926	0.377064	-0.0597382	2.73073	2.32926	1.74611	0.150649	0.198986	0.298104	0.215913	0.0751707
	3h	24.2736	23.8524	23.9501	-1.28173	-1.40527	-0.998371	0.783081	0.54693	0.807478	0.581124	0.684475	0.57138	0.612326	0.0626722
	6h	25.8659	25.9616	26.0187	-0.80131	-0.508606	-0.610733	1.2635	1.44359	1.19512	0.416533	0.367651	0.436751	0.406978	0.035527
	12h	24.2464	24.3528	24.5975	-2.68015	-1.89455	-2.29308	-0.615343	0.0576477	-0.487228	1.53192	0.960829	1.40175	1.29817	0.299305
	24h	23.5982	23.7116	23.4871	-1.41645	-1.22339	-1.31163	0.648359	0.728802	0.494223	0.638005	0.603405	0.709944	0.650451	0.0543491
	48h	23.0299	23.3735	23.8224	-3.8	-3.07699	-2.27524	-1.73519	-1.12479	-0.469393	3.32924	2.1807	1.38453	2.29815	0.977661
Cu	0h	22.9716	23.3965	22.9773	-2.93634	-2.55282	-2.90235	0	0	0	1.04975	0.912645	1.0376	1	0.0759
	1h	25.7636	26.2281	26.1171	-2.45121	-2.29367	-2.62517	0.485125	0.25915	0.277178	0.714435	0.83558	0.825204	0.79174	0.0671483
	3h	21.8726	21.7069	22.0153	-3.68271	-3.55071	-2.93316	-0.746376	-0.99789	-0.0308075	1.67757	1.99708	1.02158	1.56541	0.497325
	6h	24.4966	24.5198	24.4617	-2.17061	-1.95043	-2.16769	0.765726	0.602396	0.734657	0.588157	0.658659	0.600961	0.615926	0.0375578
	12h	23.0654	23.6679	22.9794	-3.86108	-2.57949	-3.9111	-0.924744	-0.0266647	-1.00875	1.89835	1.01865	2.01217	1.64306	0.543735
	24h	22.3133	22.704	23.1478	-2.70137	-2.23104	-1.6509	0.23497	0.321783	1.25145	0.849703	0.80008	0.420027	0.689937	0.235062
	48h	22.7016	22.7021	22.2823	-4.12839	-3.74829	-3.81535	-1.19205	-1.19547	-0.913	2.28477	2.29019	1.88296	2.15264	0.233567
