# Supplementary material for: Effects of salinity change on two superoxide dismutases (SODs) in juvenile marbled eel Anguilla marmorata
Source: PeerJ. 2016 Aug 2;4:e2149. doi: 10.7717/peerj.2149 (PMC4975029; doi:10.7717/peerj.2149)
Supplement: Supplemental Information 3 — The tissues of gill, intestine, kidney, liver and muscle were collected from six juvenile eels from control group (FW (0 h, salinity of 0‰)) and salinity adapted groups (10‰(BW), 25‰(SW)) at desired time points (1, 3, 6, 12, 24 and 48 h) to assess the expressions of the total SOD and Cu/ZnSOD activity at the enzymatic activity level. The total SOD enzymatic activity and Cu/ZnSOD enzymatic activity datas was determined using the SOD Typing Testing Kit (Jiancheng Bioengineering, Nanjing, China; http://www.njjcbio.com/). The fold-change post salinity treatment was determined by comparing with the enzymatic activity level in FW group (0 h). Each experiment was conducted in triplicate. [file peerj-04-2149-s003.xlsx]

## Sheet: 总酶活
		S10(10盐度)						S25（25盐度）
		1	2	3	mean	SD	3*mean	1	2	3	mean	SD	3*mean
Gill	0h	112	106.5	106.7	108.4	3.11929	325.2	112	106.5	106.7	108.4	3.11929	325.2
	1h	95.3	99.2	98.6	97.7	2.1	293.1	101.2	104.2	105.7	103.7	2.29129	311.1
	3h	94.8	92.3	93.1	93.4	1.27671	280.2	116.7	120.6	118.2	118.5	1.96723	355.5
	6h	93.2	95.7	95.2	94.7	1.32288	284.1	82.4	83.5	83.4	83.1	0.60828	249.3
	12h	110.2	116.4	117.5	114.7	3.93573	344.1	82.9	84.6	83.9	83.8	0.8544	251.4
	24h	86.3	89.9	89	88.4	1.8735	265.2	90.3	94.1	93.7	92.7	2.08806	278.1
	48h	96.4	93.2	97.5	95.7	2.23383	287.1	130.6	134.2	129.4	131.4	2.498	394.2
				0		--	0			0		--
Intestine	0h	107.8	112.6	111.1	110.5	2.45561	331.5	107.8	112.6	111.1	110.5	2.45561	331.5
	1h	195.8	201.4	199.2	198.8	2.82135	596.4	172.4	169.2	173.5	171.7	2.23383	515.1
	3h	252.3	253.4	242.8	249.5	5.82838	748.5	199.8	205.1	200.5	201.8	2.87924	605.4
	6h	193.9	196.3	195.7	195.3	1.249	585.9	135.3	132.9	136.5	134.9	1.83303	404.7
	12h	188.3	189.2	184.4	187.3	2.55147	561.9	241.8	245.2	244.4	243.8	1.77764	731.4
	24h	187.9	190.7	197.4	192	4.8816	576	153.8	156.7	151.5	154	2.60576	462
	48h	204.9	198.8	204.1	202.6	3.31512	607.8	160.2	156.9	159.9	159	1.82483	477
				0		--	0			0		--	0
Kidney	0h	223.1	219.8	222.2	221.7	1.70587	665.1	223.1	215.8	226.2	221.7	5.33948	665.1
	1h	261.9	257.3	257.8	259	2.52389	777	180.3	178.2	189.9	182.8	6.23779	548.4
	3h	319.6	322.4	312	318	5.38145	954	104.5	106.3	106.6	105.8	1.13578	317.4
	6h	272.9	276.1	273	274	1.81934	822	167.2	170.3	167.4	168.3	1.73494	504.9
	12h	250.4	251.6	245	249	3.51568	747	171.3	167.3	171.1	169.9	2.25389	509.7
	24h	258.4	264.4	257.2	260	3.85746	780	180.5	183.2	173.9	179.2	4.78435	537.6
	48h	344.1	333.7	345.2	341	6.34586	1023	140.5	136.4	136.2	137.7	2.42693	413.1
				0		--	0			0		--	0
Liver	0h	469.2	463.1	468.1	466.8	3.25115	1400.4	469.2	463.1	468.1	466.8	3.25115	1400.4
	1h	596.8	601.3	598.6	598.9	2.26495	1796.7	761.2	767.7	782.6	770.5	10.9713	2311.5
	3h	632.8	642.5	644.1	639.8	6.11474	1919.4	702.1	700.3	711.7	704.7	6.12862	2114.1
	6h	672.2	687.2	686	681.8	8.33547	2045.4	693.1	682.5	695.9	690.5	7.06824	2071.5
	12h	680.2	692.5	696.1	689.6	8.33727	2068.8	842.1	835.2	820.2	832.5	11.1969	2497.5
	24h	812.4	796.2	809.1	805.9	8.56096	2417.7	846.2	848.9	832.7	842.6	8.67929	2527.8
	48h	652.1	662.3	658.4	657.6	5.14684	1972.8	771.2	760.1	753.8	761.7	8.80965	2285.1
				0		--	0			0		--	0
Muscle	0h	78.3	81.2	78.4	79.3	1.64621	237.9	78.3	81.2	78.4	79.3	1.64621	237.9
	1h	143.7	148.9	142.4	145	3.43948	435	103.2	105.3	103.2	103.9	1.21244	311.7
	3h	196.7	197.9	190.4	195	4.02865	585	135.3	131.4	123.6	130.1	5.95735	390.3
	6h	145.6	142.3	141.1	143	2.33024	429	121.2	123.4	115.7	120.1	3.96611	360.3
	12h	150.5	147.8	148.7	149	1.37477	447	108.3	110.2	113	110.5	2.36432	331.5
	24h	132.8	130.3	129.9	131	1.57162	393	87.2	85.9	87.9	87	1.01489	261
	48h	174.3	178.3	172.4	175	3.01164	525	54.9	52.9	52.4	53.4	1.32288	160.2

## Sheet: cu  zn酶活
		S10(盐度10)						S25（盐度25）
Gill					mean	SD					mean	SD
	0h	54.8	55.1	50.3	53.4	2.68887	160.2	54.8	55.1	50.3	53.4	2.68887	160.2
	1h	45.2	44.7	43	44.3	1.15326	132.9	46.2	47.3	46.6	46.7	0.55678	140.1
	3h	43.8	42.1	41.9	42.6	1.04403	127.8	34.1	34.9	36	35	0.95394	105
	6h	59.3	59.6	53.9	57.6	3.2078	172.8	37.2	36.9	39.6	37.9	1.47986	113.7
	12h	68.2	67.9	62.8	66.3	3.0348	198.9	30.2	31.5	35.2	32.3	2.59422	96.9
	24h	56.8	58.4	53.1	56.1	2.71846	168.3	40.2	42.2	37.3	39.9	2.46374	119.7
	48h	49.4	49.2	46.9	48.5	1.38924	145.5	40.2	40.7	36.7	39.2	2.17945	117.6
				0		--	0			0		--	0
Intestine	0h	58.9	59.8	55.9	58.2	2.04206	174.6	58.9	59.8	55.9	58.2	2.04206	174.6
	1h	174.3	175.4	172.3	174	1.57162	522	62.3	63.4	60	61.9	1.73494	185.7
	3h	116.2	115.2	113	114.8	1.63707	344.4	67.8	66.7	62.6	65.7	2.74044	197.1
	6h	136.4	137.3	131.9	135.2	2.8931	405.6	51.4	53.1	47.3	50.6	2.98161	151.8
	12h	151.1	152.2	142.2	148.5	5.48361	445.5	81.4	82.9	77.2	80.5	2.95466	241.5
	24h	170.2	171.3	158	166.5	7.38173	499.5	70.3	68.4	75.5	71.4	3.6756	214.2
	48h	175.9	176.2	164.5	172.2	6.67008	516.6	64.4	60.8	60.8	62	2.07846	186
				0		--	0			0		--	0
Kidney	0h	145.8	146.7	139.5	144	3.92301	432	145.8	146.7	139.5	144	3.92301	432
	1h	191.2	193.2	185.6	190	3.93954	570	69.3	68.4	65.1	67.6	2.21133	202.8
	3h	225.1	224.5	219.4	223	3.13209	669	50.2	49.2	45.2	48.2	2.64575	144.6
	6h	236.4	237.8	230.8	235	3.70405	705	67.3	67.2	63.8	66.1	1.99249	198.3
	12h	241.2	243.3	229.5	238	7.43572	714	71.3	70.4	67.4	69.7	2.04206	209.1
	24h	215.2	216.2	213.6	215	1.31149	645	79.4	80.3	76.1	78.6	2.21133	235.8
	48h	267.1	265.3	259.6	264	3.91535	792	66.3	67.3	63.2	65.6	2.13776	196.8
				0		--	0			0		--	0
Liver	0h	260.1	261.4	252.5	258	4.80729	774	260.1	261.4	252.5	258	4.80729	774
	1h	462.3	468.2	476.5	469	7.13372	1407	540.3	541.2	528.9	536.8	6.85638	1610.4
	3h	608.3	605.2	598.5	604	5.00899	1812	498.4	498.6	490.7	495.9	4.50444	1487.7
	6h	658.2	654.2	637.6	650	10.9234	1950	489.3	488.2	480.2	485.9	4.96689	1457.7
	12h	341.2	339.2	333.6	338	3.93954	1014	594.9	593.5	577.7	588.7	9.55196	1766.1
	24h	513.4	517.3	505.3	512	6.12127	1536	525.3	520.8	512.4	519.5	6.54752	1558.5
	48h	623.1	620.2	610.7	618	6.48614	1854	206.2	208.7	213	209.3	3.43948	627.9
				0		--	0			0		--	0
Muscle	0h	54.3	56.1	48.6	53	3.91535	159	54.3	56.1	48.6	53	3.91535	159
	1h	101.9	102.4	98.7	101	2.00749	303	49.3	49.3	45.4	48	2.25167	144
	3h	117.2	116.4	111.4	115	3.14325	345	63.7	62.2	59.8	61.9	1.96723	185.7
	6h	99.3	100.5	94.2	98	3.34515	294	35.6	34.7	37.1	35.8	1.21244	107.4
	12h	104.8	103.2	98	102	3.55528	306	51.8	50.3	44.9	49	3.62905	147
	24h	84.3	85.6	79.1	83	3.43948	249	28.7	28.1	29.9	28.9	0.91652	86.7
	48h	124.3	122.3	116.4	121	4.10731	363	36.9	36.4	33.2	35.5	2.00749	106.5
